# Supplementary material for: Supplementation with a New Standardized Extract of Green and Black Tea Exerts Antiadipogenic Effects and Prevents Insulin Resistance in Mice with Metabolic Syndrome
Source: MDPI journal article supplement (doi:10.3390/ijms24108521), 2023-05-10
Supplement: s1 [file s1]

## SUPPLEMENTARY INFORMATION

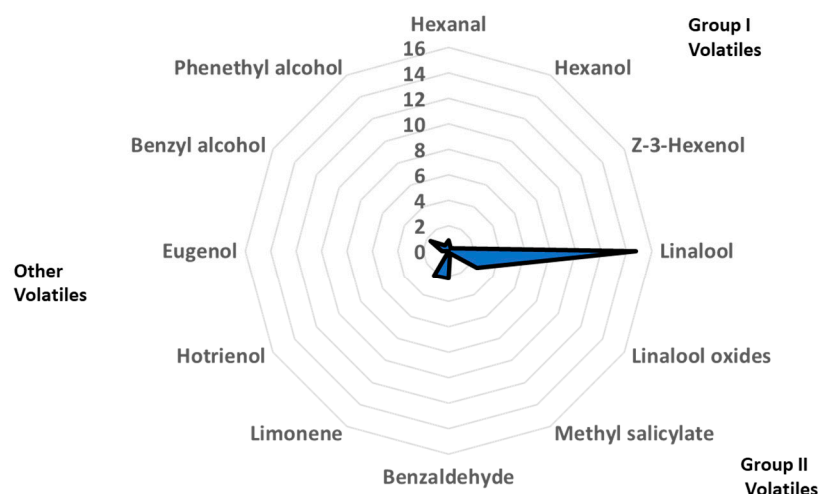

**Figure S1.** Volatile composition (relative proportion, %) of Complex Tea Extract analyzed by gas chromatography.

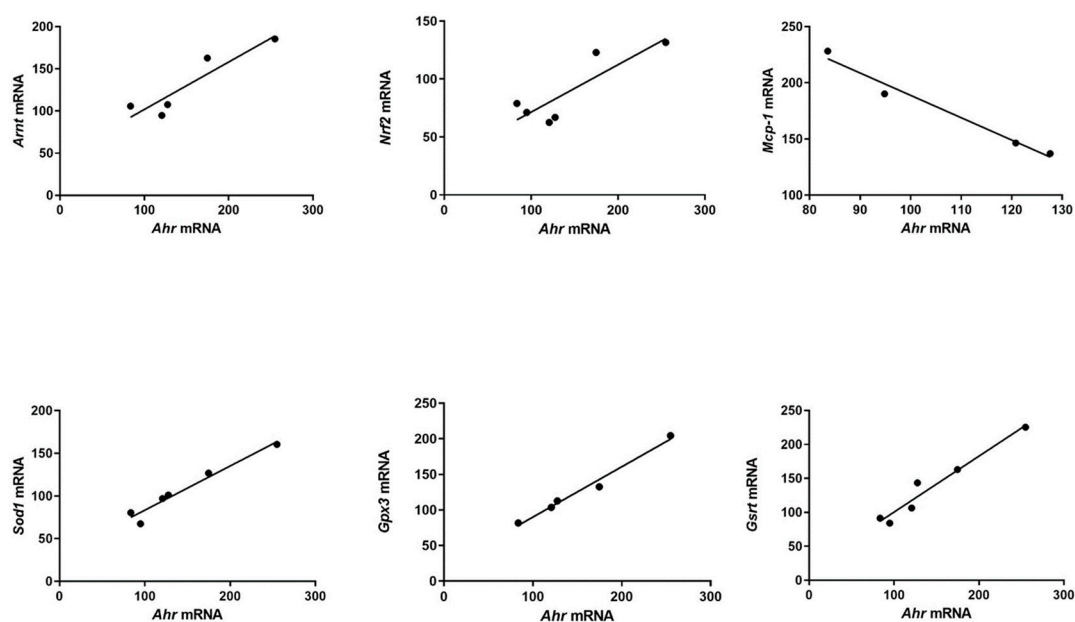

**Figure S2.** Correlation between AhR gene expression and antioxidants, pro-inflammatory and AHR-pathway genes in gastrocnemius tissue in mice supplemented with green-black tea extract. Values are represented as mean  $\pm$  SEM; n=6-8 mice/group.
